# Supplementary material for: Estimation of the fraction of COVID-19 infected people in U.S. states and countries worldwide
Source: PubMed Central journal article supplement (PMC7869996; doi:10.1371/journal.pone.0246772), 2021-02-08

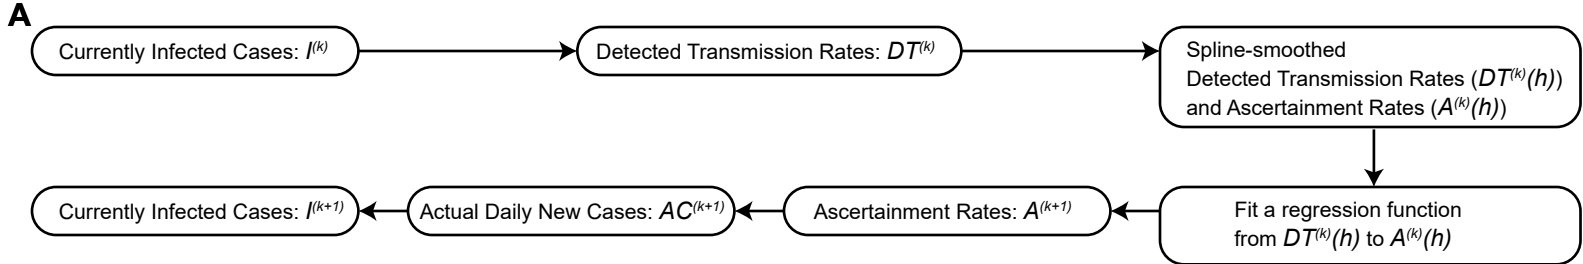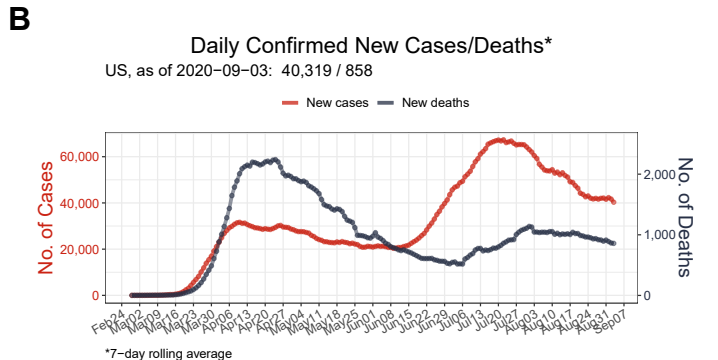

1. Initialization

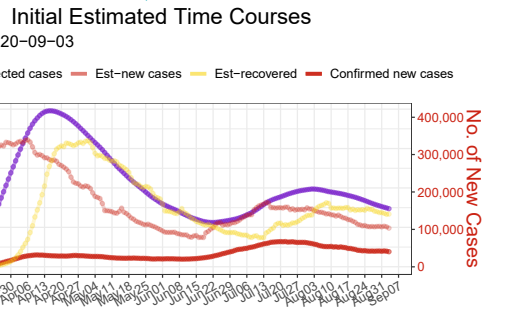

2. EM iterations

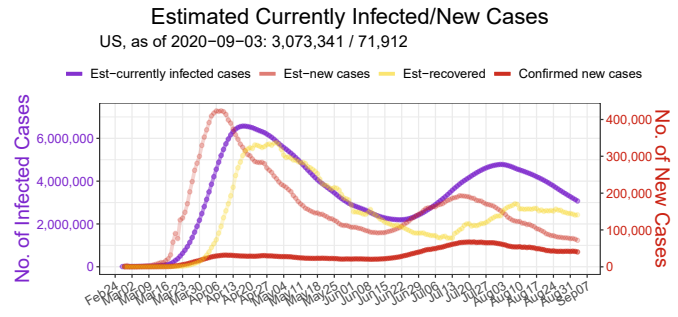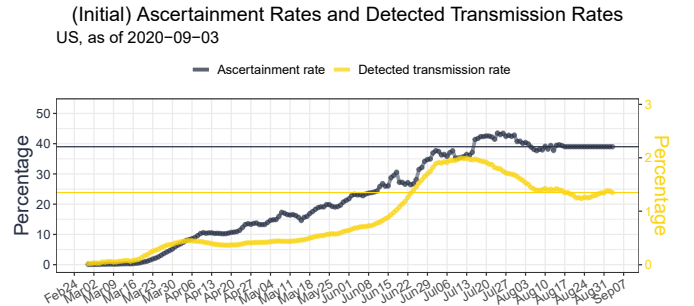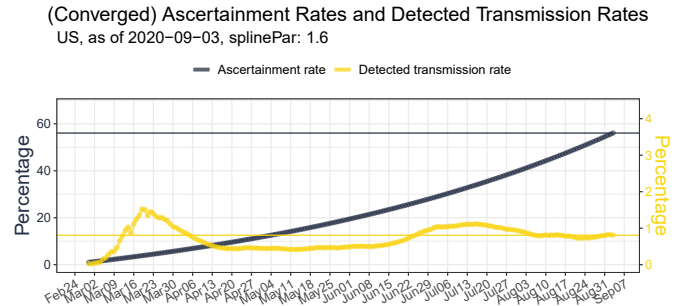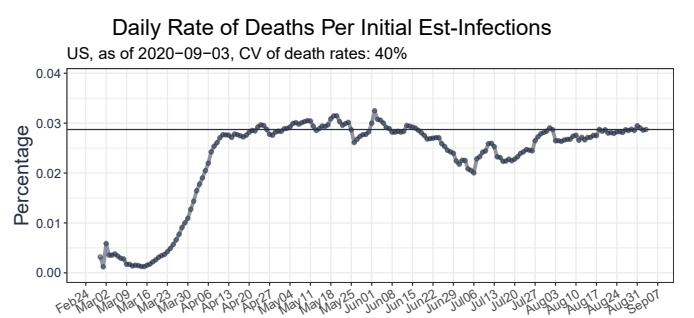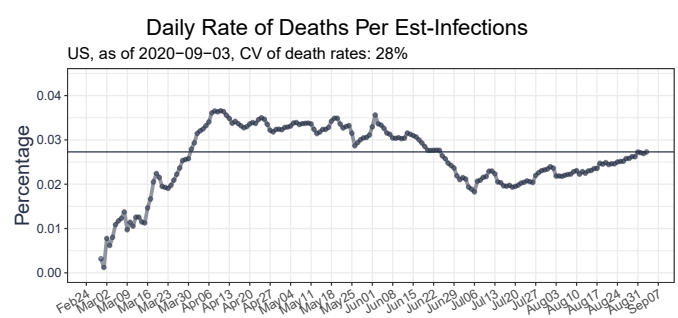

3. Calculate Confidence Intervals

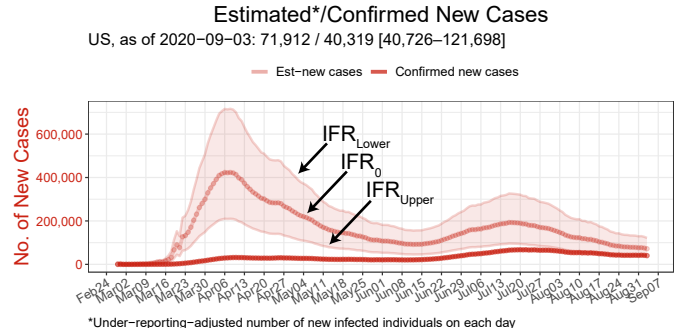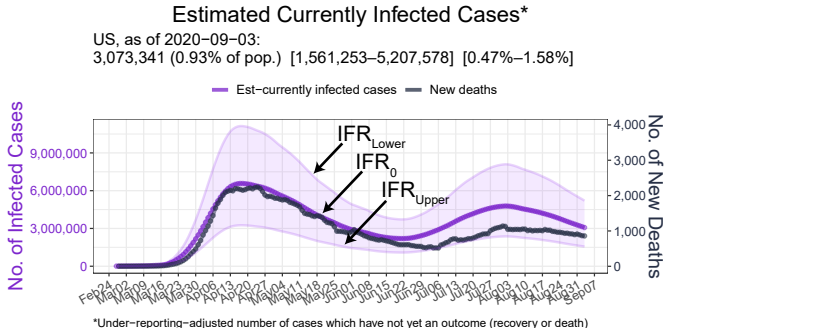

Supplement: pone.0246772.s001.pdf [file pone.0246772.s001.pdf]
